# Supplementary material for: Genome-wide survey and expression analysis of F-box genes in chickpea
Source: PubMed Central journal article supplement (PMC4340835; doi:10.1186/s12864-015-1293-y), 2015-02-13
Supplement: 12864_2015_1293_MOESM1_ESM.pdf [file 12864_2015_1293_MOESM1_ESM.pdf]

**Table S1.** List of primers used in the study

| <b>Primer Name</b> | <b>Primer sequence</b>         |
|--------------------|--------------------------------|
| Ca_16962           | F: GCTGAAGCAGTTATGCGAGATG      |
|                    | R: GGCCACGTTGGCATTAC           |
|                    |                                |
| Ca_00119           | F: CCCTGAAGATGAAGCGAAAA        |
|                    | R: TCTGATACTTGAACCCAACATGCT    |
|                    |                                |
| Ca_06676           | F: CAGAGGAAGCAACTCAGAACGA      |
|                    | R: GAGAAGGACAGCCATGAGCAA       |
|                    |                                |
| Ca_10245           | F: GGAATGCCCATCTGTTTGA         |
|                    | R: GGACCATCATGACCCCAAAG        |
|                    |                                |
| Ca_12512           | F: GGAACCAGGCTTGCTTTTGTC       |
|                    | R: GGAAGAATTGGATTCACAACCTGA    |
|                    |                                |
| Ca_02030           | F: CGGAGGGTAGAAGAGACTGAGACT    |
|                    | R: GATTTACACACGGAAGCACAAGAA    |
|                    |                                |
| Ca_03816           | F: GACGAAGGCTAAGATACCAGATTGT   |
|                    | R: CTCCTCAGAACGAGTTCGATTG      |
|                    |                                |
| Ca_04384           | F: TGC GGCTCCTACGACAACA        |
|                    | R: AATAATCTTGTCATGGTCAGACTGTGT |
|                    |                                |
