# Supplementary material for: Genome-wide survey and expression analysis of F-box genes in chickpea
Source: PubMed Central journal article supplement (PMC4340835; doi:10.1186/s12864-015-1293-y), 2015-02-13
Supplement: 12864_2015_1293_MOESM3_ESM.pdf [file 12864_2015_1293_MOESM3_ESM.pdf]

**Table S3** Putative motifs predicted in F-box proteins of FBX family by MEME.

| Motif No. | Length of motif | No. of sites | Sequence                                                                                                                                    | Sequence logo | E-value  |
|-----------|-----------------|--------------|---------------------------------------------------------------------------------------------------------------------------------------------|---------------|----------|
| 1         | 50              | 9            | P[DV]MP[TI][LIV][GS]VL[GM]DCLCFS[YH][YDS][PF][NK][KG][TFI][NEH]FV[IL]W[KQ]M[QK][EI][FY]GV[EQY]ESW[TV][QK][FL][LI]KIS[YH][QH][NT][LQ][HQ]    |               | 4.8e-188 |
| 3         | 21              | 26           | SLL[RQ]L[RK]CV[CS]KSWR[AS]LIS[DN]PxF                                                                                                        |               | 5.1e-152 |
| 4         | 29              | 8            | V[ED]QF[RV]IVSLDL[GS]TETY[NR]Q[YL][LM]LPRGFD[EK][MV]P                                                                                       |               | 8.6e-103 |
| 5         | 21              | 10           | V[RK][IV][FLH][TS][LF]G[DT]N[VS]W[RK][DNR][EQ][SD]FP[VT][VG][PV]                                                                            |               | 3.7e-069 |
| 6         | 17              | 17           | xF[AS]FGYD[NH]STDYKVVVA                                                                                                                     |               | 1.2e-066 |
| 7         | 41              | 5            | [FN][EG]DTLIL[RTA][SR][HSN][QK][GRE]Q[SV][FLR]YN[WK][RI][DNH]N[ITR][VL][EY][EK][IT][NR][VI]T[IN][GNTV][NI][NY][RTW][TY][TL][DA][YN][VQ][EF] |               | 9.1e-062 |
| 10        | 28              | 9            | [ATV]VRT[SC][VI]LS[KT]RWI[DH][LV]W[KT][LN][ITFP][HN]L[DHS]FD[DW]S[FH][MN]                                                                   |               | 4.2e-059 |
| 13        | 29              | 9            | [FR][KD][NES][DGRS]G[VK][YFH][LV][GNS]GT[VIL]NWLA[MIS][DKT][ND][DY][FT][PES]Y[SW]V[LI][KV][NS][HL]                                          |               | 1.5e-048 |
| 14        | 28              | 7            | [NK][EG][SW][AI][ST][FV][FI][FL][LE][NR][PR]V[TQ][KN][AI][RH][IQ][MQ][IY][PA][SN]KL[FY][FI]PSK                                              |               | 1.4e-047 |
| 25        | 29              | 5            | [GHN]F[CQS][YA][INH][KVI][KL][TL]RQ[LI][TH][KE][IV][ED][CRG][IL][KPA][LEIM][GL][FNY][FY][KE][VA][WL][LR][HQ][TA]N                           |               | 1.5e-026 |
| 32        | 22              | 21           | x[DS]LARA[SA]C[VT]C[KS]x[WL]Nx[AL]AS[DS][DEP]xL                                                                                             |               | 3.9e-020 |
| 40        | 29              | 5            | K[VF][VF][KQT][FMV][KQV][GR]F[NTA][GA][KNT][EKP][HLC][ED][LV][CNS][FL][VA][KQ][FHL]Y[LVM][MI][KAT][NKR]A[YALT][MTA][LM][EK]                 |               | 1.2e-015 |
| 48        | 21              | 6            | L[AN][KR][DC][ER][AN]S[GR][EN]L[YE][LI][IL]Y[MR]E[CG][MN]V[EQ]Y                                                                             |               | 7.8e-014 |
