# Supplementary material for: Genome-wide survey and expression analysis of F-box genes in chickpea
Source: PubMed Central journal article supplement (PMC4340835; doi:10.1186/s12864-015-1293-y), 2015-02-13
Supplement: 12864_2015_1293_MOESM4_ESM.pdf [file 12864_2015_1293_MOESM4_ESM.pdf]

**Table S4** Enriched GO terms associated with F-box genes in chickpea

| <b>GO ID</b> | <b>GO Term</b>                                 | <b>FDR</b> | <b>P-Value</b> |
|--------------|------------------------------------------------|------------|----------------|
| GO:0007275   | multicellular organismal development           | 1.51E-03   | 7.49E-05       |
| GO:0044707   | single-multicellular organism process          | 1.51E-03   | 7.49E-05       |
| GO:0044767   | single-organism developmental process          | 1.51E-03   | 7.49E-05       |
| GO:0032502   | developmental process                          | 1.51E-03   | 7.49E-05       |
| GO:0032501   | multicellular organismal process               | 1.51E-03   | 7.49E-05       |
| GO:0044699   | single-organism process                        | 1.51E-03   | 8.30E-05       |
| GO:0044238   | primary metabolic process                      | 1.68E-03   | 1.55E-04       |
| GO:0071704   | organic substance metabolic process            | 1.68E-03   | 1.55E-04       |
| GO:0009605   | response to external stimulus                  | 1.68E-03   | 1.70E-04       |
| GO:0043170   | macromolecule metabolic process                | 1.68E-03   | 1.70E-04       |
| GO:0019538   | protein metabolic process                      | 1.68E-03   | 1.70E-04       |
| GO:0008152   | metabolic process                              | 1.70E-03   | 1.87E-04       |
| GO:0009987   | cellular process                               | 4.70E-03   | 5.61E-04       |
| GO:0009607   | response to biotic stimulus                    | 1.11E-02   | 1.58E-03       |
| GO:0009056   | catabolic process                              | 1.11E-02   | 1.58E-03       |
| GO:0009791   | post-embryonic development                     | 1.11E-02   | 1.63E-03       |
| GO:0050896   | response to stimulus                           | 1.84E-02   | 2.88E-03       |
| GO:0048856   | anatomical structure development               | 2.59E-02   | 5.84E-03       |
| GO:0048731   | system development                             | 2.59E-02   | 6.43E-03       |
| GO:0009908   | flower development                             | 2.59E-02   | 6.43E-03       |
| GO:0061458   | reproductive system development                | 2.59E-02   | 6.43E-03       |
| GO:0003006   | developmental process involved in reproduction | 2.59E-02   | 6.43E-03       |
| GO:0044702   | single organism reproductive process           | 2.59E-02   | 6.43E-03       |
| GO:0090567   | reproductive shoot system development          | 2.59E-02   | 6.43E-03       |
| GO:0048608   | reproductive structure development             | 2.59E-02   | 6.43E-03       |
| GO:0048367   | shoot system development                       | 2.59E-02   | 6.43E-03       |
| GO:0022414   | reproductive process                           | 2.59E-02   | 6.43E-03       |
| GO:0044763   | single-organism cellular process               | 3.94E-02   | 1.01E-02       |
| GO:0003824   | catalytic activity                             | 4.76E-02   | 1.27E-02       |
