# Supplementary material for: Genome-wide survey and expression analysis of F-box genes in chickpea
Source: PubMed Central journal article supplement (PMC4340835; doi:10.1186/s12864-015-1293-y), 2015-02-13
Supplement: 12864_2015_1293_MOESM6_ESM.pdf [file 12864_2015_1293_MOESM6_ESM.pdf]

**Table S6** F-box genes present on duplicated chromosomal segments of chickpea.

| <b>Gene ID</b> | <b>Subfamily</b> | <b>Chr. No.</b> | <b>Gene ID</b> | <b>Subfamily</b> | <b>Chr. No.</b> |
|----------------|------------------|-----------------|----------------|------------------|-----------------|
| Ca_00072       | FBX              | 1               | Ca_10844       | FBD              | 4               |
| Ca_00239       | FBX              | 1               | Ca_18629       | FBX              | 4               |
| Ca_00477       | FBL              | 1               | Ca_04481       | FBX              | 4               |
| Ca_00491       | FBK              | 1               | Ca_04347       | FBX              | 4               |
| Ca_00569       | FBL              | 1               | Ca_03430       | FBL              | 4               |
| Ca_02738       | FBD              | 1               | Ca_03860       | FBD              | 4               |
| Ca_07074       | FBX              | 1               | Ca_07837       | FBX              | 4               |
|                |                  |                 |                |                  |                 |
| Ca_00119       | FBK              | 1               | Ca_13764       | FBK              | 7               |
| Ca_00477       | FBL              | 1               | Ca_17789       | FBL              | 7               |
| Ca_00491       | FBK              | 1               | Ca_17780       | FBO              | 7               |
| Ca_00569       | FBL              | 1               | Ca_16156       | FBL              | 7               |
| Ca_02771       | FBDUF            | 1               | Ca_19520       | FBD              | 7               |
| Ca_12896       | FBT              | 1               | Ca_15312       | FBT              | 7               |
|                |                  |                 |                |                  |                 |
| Ca_04496       | FBP              | 4               | Ca_16392       | FBP              | 7               |
| Ca_05387       | FBX              | 4               | Ca_17789       | FBL              | 7               |
| Ca_13105       | FBL              | 4               | Ca_16156       | FBL              | 7               |
| Ca_14894       | FBA              | 4               | Ca_23636       | FBA              | 7               |
| Ca_10844       | FBD              | 4               | Ca_19520       | FBD              | 7               |
| Ca_10800       | FBT              | 4               | Ca_15312       | FBT              | 7               |

Six segmental duplication pairs belonging to different subfamilies are shown in red.
