# Supplementary material for: Genome-wide survey and expression analysis of F-box genes in chickpea
Source: PubMed Central journal article supplement (PMC4340835; doi:10.1186/s12864-015-1293-y), 2015-02-13
Supplement: 12864_2015_1293_MOESM9_ESM.pdf [file 12864_2015_1293_MOESM9_ESM.pdf]

**Table S9** Sizes of common subfamilies in four plant species, Arabidopsis, rice, *M. truncatula* and chickpea

| <b>Species<br/>(Total no. of F-<br/>box genes)</b> | <b>FBX</b>     | <b>FBA</b>  | <b>FBK</b>    | <b>FBDUF</b> | <b>FBD</b>   | <b>FBL</b>   | <b>FBT</b>   | <b>FBW</b>  |
|----------------------------------------------------|----------------|-------------|---------------|--------------|--------------|--------------|--------------|-------------|
| Arabidopsis <sup>1</sup><br>(694)                  | 374<br>(53.8%) | -           | 97<br>(13.9%) | -            | -            | 160<br>(23%) | 10<br>(1.4%) | 2<br>(0.2%) |
| Rice <sup>2</sup><br>(687)                         | 465<br>(67.6%) | 4<br>(0.5%) | 25<br>(3.7%)  | 66<br>(9.6%) | 17<br>(2.4%) | 61<br>(8.8%) | 14<br>(2%)   | 2<br>(0.2%) |
| <i>M. truncatula</i> <sup>3</sup><br>(1148)        | 334<br>(29%)   | 84<br>(7%)  | 25<br>(2%)    | 13<br>(1%)   | 27<br>(2%)   | 27<br>(2%)   | 7<br>(1%)    | -           |
| Chickpea<br>(285)                                  | 86<br>(30%)    | 25<br>(9%)  | 34<br>(12%)   | 16<br>(6%)   | 39<br>(14%)  | 32<br>(11%)  | 10<br>(4%)   | 4<br>(1.4%) |

<sup>1</sup>Data taken from Gagne et al. (2002)

<sup>2</sup>Data taken from Jain et al. (2007)

<sup>3</sup>Data taken from Hua et al. (2011)

C-terminal domains found common in the four species have been shown.
